# Supplementary material for: Novel Bat Lyssaviruses Identified by Nationwide Passive Surveillance in Taiwan, 2018–2021
Source: MDPI journal article supplement (doi:10.3390/v14071562), 2022-07-18
Supplement: s1 [file s1]

# Novel bat lyssaviruses identified by nationwide passive surveillance in Taiwan, 2018-2021

**Table S1.** The modified primer used in the whole genome sequence for the isolates in this study.

| Primer name   | Sequence, 3'-----5'      | Location<br>(NC055474) | Isolate used                                       |
|---------------|--------------------------|------------------------|----------------------------------------------------|
| TWBLV 1F [4]  | ACGCTTAACGACAAAAYC       | 1-18                   | TWBLV-2/NT/2018, TWBLV-1/YiL/2018, TWBLV-1/KL/2020 |
| TWBLV 1R [4]  | TCTTGCATTTCTTTCTCATC     | 1154-1173              | TWBLV-2/NT/2018, TWBLV-1/YiL/2018, TWBLV-1/KL/2020 |
| TWBLV 2F [4]  | TTCGTAGGATGTTACATGGG     | 1010-1029              | TWBLV-1/KL/2020                                    |
| TWBLV 2R [4]  | TAAAAATATCCCAGAAGATC     | 2181-2200              | TWBLV-1/KL/2020                                    |
| TWBLV 3F [4]  | AGARATAGCWCATCAGATWGC    | 2125-2145              | TWBLV-2/NT/2018, TWBLV-1/YiL/2018, TWBLV-1/KL/2020 |
| TWBLV 3R [4]  | CTATTGTGTGGCACCATWAC     | 3210-3229              | TWBLV-2/NT/2018, TWBLV-1/YiL/2018, TWBLV-1/KL/2020 |
| TWBLV 4F [4]  | GATGAGGATAAGAACACATC     | 3078-3097              | TWBLV-1/KL/2020                                    |
| TWBLV 4R [4]  | TCCTGAAGTGACTGAGTTTTC    | 4278-4298              | TWBLV-1/KL/2020                                    |
| TWBLV 5F [4]  | CTGATGGAYGGRTCATGGGT     | 4085-4104              | TWBLV-2/NT/2018, TWBLV-1/KL/2020                   |
| TWBLV 5R [4]  | GAGACAGGAGCCGGAGTCTT     | 5283-5302              | TWBLV-1/KL/2020                                    |
| TWBLV 6F [4]  | AACAGGTAGCTCCCGAGTTTGTC  | 4884-4907              | TWBLV-2/NT/2018, TWBLV-1/KL/2020                   |
| TWBLV 6R [4]  | CTGAGTGAGACCCATGTATCCAAA | 5774-5797              | TWBLV-1/KL/2020                                    |
| TWBLV 7F [4]  | ACTGAGGTTTATGATGACCC     | 5485-5504              | TWBLV-2/NT/2018, TWBLV-1/YiL/2018, TWBLV-1/KL/2020 |
| TWBLV 7R [4]  | CCCCAGTGTCTATARCAWCC     | 6568-6587              | TWBLV-2/NT/2018, TWBLV-1/KL/2020                   |
| TWBLV 8F [4]  | CATTCTTTGGGGATTTC        | 6433-6452              | TWBLV-1/YiL/2018, TWBLV-1/KL/2020                  |
| TWBLV 8R [4]  | GTTTGTGATTCTCTRTCWATC    | 7602-7622              | TWBLV-1/YiL/2018, TWBLV-1/KL/2020                  |
| TWBLV 9F [4]  | CATGCTGGAACGGTCAGGAYG    | 7529-7549              | TWBLV-2/NT/2018, TWBLV-1/KL/2020                   |
| TWBLV 9R [4]  | CTGAGTTAAAGAAAGATTCTT    | 8669-8689              | TWBLV-1/KL/2020                                    |
| TWBLV 10F [4] | CTCAGTGAGTTRTTYAGCTC     | 8554-8573              | TWBLV-2/NT/2018, TWBLV-1/YiL/2018, TWBLV-1/KL/2020 |
| TWBLV 10R [4] | CAGATAGAAGAGCCTATT       | 9753-9770              | TWBLV-1/KL/2020                                    |
| TWBLV 11F [4] | CATGATTCAGGGTAYAAAYGA    | 9655-9674              | TWBLV-2/NT/2018, TWBLV-1/YiL/2018, TWBLV-1/KL/2020 |

|                 |                          |             |                                                    |
|-----------------|--------------------------|-------------|----------------------------------------------------|
| TWBLV 11R [4]   | GTCTGTAACCTTCTGCATCAC    | 10859-10878 | TWBLV-2/NT/2018, TWBLV-1/YiL/2018, TWBLV-1/KL/2020 |
| TWBLV 12F [4]   | ATCTGGGAAAAGCCATCAGA     | 10762-10781 | TWBLV-2/NT/2018, TWBLV-1/KL/2020                   |
| TWBLV 12R [4]   | ACGCTTAACAAAAAAACAA      | 11969-11988 | TWBLV-2/NT/2018, TWBLV-1/YiL/2018, TWBLV-1/KL/2020 |
| TWBLV-2-2F      | TTTGTGGGTGCTATATGGG      | 1010-1029   | TWBLV-2/NT/2018                                    |
| TWBLV-2-2R      | GAGAAATATCCCGGAGGACC     | 2181-2200   | TWBLV-2/NT/2018                                    |
| TWBLV-2-4F      | GATGAGGACAAGAACACCTC     | 3078-3097   | TWBLV-2/NT/2018                                    |
| TWBLV-2-4R      | TTCTAAAATGACTGAGCCTCC    | 4278-4298   | TWBLV-2/NT/2018                                    |
| TWBLV-2-5R      | GAAAGGTGAACAGTTGAAAT     | 4633-4652   | TWBLV-2/NT/2018                                    |
| TWBLV-2-6R      | CTGAATGAGATCCGTGTATCCACA | 5774-5797   | TWBLV-2/NT/2018                                    |
| TWBLV-2-8F      | CATTCTTTGGGTGACTTTCC     | 6433-6452   | TWBLV-2/NT/2018                                    |
| TWBLV-2-8R      | CATATAAGTCGGGCATAAG      | 7668-7886   | TWBLV-2/NT/2018                                    |
| TWBLV-2-9R      | CCGAATTAAAAAAGGACTCTT    | 8669-8689   | TWBLV-2/NT/2018                                    |
| TWBLV-2-10R     | CAAATGGATGAACCTATT       | 9753-9770   | TWBLV-2/NT/2018                                    |
| TWBLV-1/YiL-2F  | TTTGTGGGATGTTATATGGG     | 1010-1029   | TWBLV-1/YiL/2018                                   |
| TWBLV-1/YiL-2R  | GAGAAATATTCCCGGAGGATC    | 2181-2200   | TWBLV-1/YiL/2018                                   |
| TWBLV-1/YiL-4F  | GACGAGGACAAGAACACTTC     | 3078-3097   | TWBLV-1/YiL/2018                                   |
| TWBLV-1/YiL-4R  | TCCTGAAATGGCTAAGTCTTC    | 4278-4298   | TWBLV-1/YiL/2018                                   |
| TWBLV-1/YiL-5R  | GGATCAGAATTTTGGGTTC      | 5283-5302   | TWBLV-1/YiL/2018                                   |
| TWBLV-1/YiL-6F  | GACAAACAAATCTTGAGGTGGTCC | 4884-4907   | TWBLV-1/YiL/2018                                   |
| TWBLV-1/YiL-6R  | CAGAGTGGGAACCATGCATCCAGA | 5774-5797   | TWBLV-1/YiL/2018                                   |
| TWBLV-1/YiL-7R  | CCCCAATGTCTGTAACACCC     | 6568-6587   | TWBLV-1/YiL/2018                                   |
| TWBLV-1/YiL-9F  | CTTGTTGGAATGGTCAAGATG    | 7529-7549   | TWBLV-1/YiL/2018                                   |
| TWBLV-1/YiL-9R  | CTGAGTTGAAGAAGGATTCTT    | 8669-8689   | TWBLV-1/YiL/2018                                   |
| TWBLV-1/YiL-10R | CATATGGAGGAACCTATC       | 9992-10009  | TWBLV-1/YiL/2018                                   |
| TWBLV-1/YiL-12F | ATCTGGGAGAAACCTTCTGA     | 10762-10781 | TWBLV-1/YiL/2018                                   |

**Table S2.** The reference sequence of the lyssavirus species included in the phylogenetic tree construction.

| Accession number | Lyssavirus name           | Abbreviation |
|------------------|---------------------------|--------------|
| NC020808         | Aravan lyssavirus         | ARAV         |
| AB094438         |                           |              |
| NC003243         | Australian bat lyssavirus | ABLV         |
| KJ685548         |                           |              |
| AF081020         |                           |              |
| KT868956         |                           |              |
| KT868955         |                           |              |
| KT868954         |                           |              |

---

|          |
|----------|
| KT868953 |
| MK944092 |
| MK944091 |
| MK944089 |
| MK492317 |
| MK944087 |
| MK492319 |
| MK492318 |
| MK492316 |
| MK492314 |
| MK492315 |
| MK492313 |
| MK492309 |
| MK492310 |
| MK492311 |
| MK492312 |
| MK944083 |
| MK944094 |
| MK944082 |
| MK944095 |
| MK944093 |
| MK944088 |
| MK944090 |
| MK944085 |
| MK944084 |
| AF418014 |
| MK944086 |
| AY573935 |
| AY573936 |
| AY573937 |
| AY573938 |
| AY573939 |
| AY573940 |
| AY573941 |
| AY573942 |
| AY573943 |
| AY573944 |
| AY573945 |
| AY573946 |
| AY573947 |
| AY573948 |
| AY573949 |

---

|          |                           |        |
|----------|---------------------------|--------|
| AY573950 |                           |        |
| AY573951 |                           |        |
| AY573952 |                           |        |
| AY573953 |                           |        |
| AY573954 |                           |        |
| AY573955 |                           |        |
| AY573956 |                           |        |
| AY573957 |                           |        |
| AY573958 |                           |        |
| AY573959 |                           |        |
| AY573960 |                           |        |
| AY573961 |                           |        |
| AY573962 |                           |        |
| AY573963 |                           |        |
| AY573964 |                           |        |
| AY573965 |                           |        |
| GU992312 |                           |        |
| NC025251 |                           |        |
| MF043188 |                           |        |
| MF197740 |                           |        |
| KC169985 |                           |        |
| JF311903 | Bokeloh bat lyssavirus    | BBLV   |
| LT839644 |                           |        |
| LT839643 |                           |        |
| LT839617 |                           |        |
| LT839642 |                           |        |
| NC020810 |                           |        |
| KC866301 |                           |        |
| GU992315 |                           |        |
| EU623437 | Duvenhage lyssavirus      | DUVV   |
| JN986749 |                           |        |
| EU293120 |                           |        |
| EU293119 |                           |        |
| EU623444 |                           |        |
| NC009527 |                           |        |
| KF042302 |                           |        |
| KF042301 |                           |        |
| KC567818 | European bat lyssavirus 1 | EBLV-1 |
| KF186269 |                           |        |
| KC567816 |                           |        |
| KC567813 |                           |        |
| GU992303 |                           |        |

|          |                           |        |
|----------|---------------------------|--------|
| EU636792 |                           |        |
| EU636789 |                           |        |
| MF187880 |                           |        |
| MF187877 |                           |        |
| MF187875 |                           |        |
| MF187861 |                           |        |
| MF187858 |                           |        |
| MF187843 |                           |        |
| MF187826 |                           |        |
| MF187824 |                           |        |
| MF187803 |                           |        |
| MF187801 |                           |        |
| MF197744 |                           |        |
| MF187855 |                           |        |
| MF197745 |                           |        |
| MF187874 |                           |        |
| MF187871 |                           |        |
| MF187831 |                           |        |
| MF187821 |                           |        |
| MF187808 |                           |        |
| KF155003 |                           |        |
| LT839608 |                           |        |
| EU626551 |                           |        |
| MF187815 |                           |        |
| MF187862 |                           |        |
| MF187820 |                           |        |
| MF187846 |                           |        |
| EU293112 |                           |        |
| MF187851 |                           |        |
| MF187848 |                           |        |
| MF187844 |                           |        |
| MF187834 |                           |        |
| MF187828 |                           |        |
| MF187814 |                           |        |
| MF187859 |                           |        |
| NC009528 |                           |        |
| GU992316 |                           |        |
| KY688152 |                           |        |
| KY688154 | European bat lyssavirus 2 | EBLV-2 |
| KY688151 |                           |        |
| MG760848 |                           |        |
| KY688149 |                           |        |

|          |                          |      |
|----------|--------------------------|------|
| KY688144 |                          |      |
| KY688140 |                          |      |
| KY688143 |                          |      |
| KY688136 |                          |      |
| KY688134 |                          |      |
| KY688155 |                          |      |
| KY688137 |                          |      |
| KY688133 |                          |      |
| NC031988 |                          |      |
| KU244268 | Gannoruwa bat lyssavirus | GBLV |
| KU244267 |                          |      |
| KU244269 |                          |      |
| NC018629 | Ikoma lyssavirus         | IKOV |
| NC020809 |                          |      |
| JX197457 | Irkut lyssavirus         | IRKV |
| MF737385 |                          |      |
| NC025385 | Khujand lyssavirus       | KHUV |
| NC020807 |                          |      |
| KP994623 |                          |      |
| KP994622 |                          |      |
| MH643892 |                          |      |
| MH643891 |                          |      |
| MH643890 |                          |      |
| HM179509 |                          |      |
| EF547459 |                          |      |
| EF547458 |                          |      |
| EF547457 |                          |      |
| EF547456 |                          |      |
| EF547455 |                          |      |
| EF547454 | Lagos bat lyssavirus     | LBV  |
| EF547453 |                          |      |
| EF547452 |                          |      |
| EF547451 |                          |      |
| EF547450 |                          |      |
| EF547449 |                          |      |
| EF547448 |                          |      |
| EF547447 |                          |      |
| DQ499948 |                          |      |
| DQ499947 |                          |      |
| DQ499946 |                          |      |
| DQ499945 |                          |      |
| DQ499944 |                          |      |

|          |                       |       |
|----------|-----------------------|-------|
| JX901139 |                       |       |
| EU293110 |                       |       |
| NC031955 | Lleida bat lyssavirus | LLEBV |
| MG983927 |                       |       |
| NC006429 |                       |       |
| KP899612 |                       |       |
| KP899611 |                       |       |
| KC218934 |                       |       |
| KC218933 |                       |       |
| KC218932 |                       |       |
| JN944637 |                       |       |
| GU992313 |                       |       |
| GU992310 | Mokola lyssavirus     | MOKV  |
| FJ465417 |                       |       |
| FJ465415 |                       |       |
| FJ465413 |                       |       |
| FJ465412 |                       |       |
| KF155005 |                       |       |
| KF155006 |                       |       |
| KF155008 |                       |       |
| EU293117 |                       |       |
| EU293118 |                       |       |
| NC001542 |                       |       |
| MW690155 |                       |       |
| KX533960 |                       |       |
| KX447689 |                       |       |
| KX434483 |                       |       |
| MW055229 |                       |       |
| MW055206 |                       |       |
| MW055143 |                       |       |
| MW055118 |                       |       |
| MW055086 | Rabies lyssavirus     | RABV  |
| MN510453 |                       |       |
| LC550025 |                       |       |
| MT241245 |                       |       |
| MK124737 |                       |       |
| MN642580 |                       |       |
| MN384718 |                       |       |
| MN968377 |                       |       |
| MK511227 |                       |       |
| MF467497 |                       |       |
| LC455982 |                       |       |

|          |                               |         |
|----------|-------------------------------|---------|
| MG383887 |                               |         |
| KY124533 |                               |         |
| MG201878 |                               |         |
| MH258829 |                               |         |
| MF574198 |                               |         |
| KP881356 |                               |         |
| KP860182 |                               |         |
| KP860174 |                               |         |
| KP860170 |                               |         |
| NC025365 | Shimoni bat lyssavirus        | SHIBV   |
| NC055474 | Taiwan bat lyssavirus 1       | TWBLV-1 |
| MF472709 |                               |         |
| NC025377 | West Caucasian bat lyssavirus | WCBV    |
| LR994545 | Kotalahti bat lyssavirus      | KBLV    |
| MW653808 | Matlo bat lyssavirus          | MBLV    |



**Table S3.** The details of the number and bat species tested in the surveillance between 2018 and 2021. Lyssavirus-positive cases are indicated (in brackets).

| Species                                | 2018    | 2019 | 2020   | 2021 | species number |
|----------------------------------------|---------|------|--------|------|----------------|
| <i>Pipistrellus abramus</i>            | 81 (1)  | 89   | 38 (1) | 47   | 255 (2)        |
| <i>Miniopterus fuliginosus</i>         | 8       | 5    | 4      | 6    | 23             |
| <i>Scotophilus kuhlii</i>              | 2       | 1    | 11     | 9    | 23             |
| <i>Hipposideros armiger terasensis</i> | 2       | 4    | 6      | 4    | 16             |
| <i>Eptesicus serotinus horikawai</i>   | 2       | 5    | 7      | 1    | 15             |
| <i>Pipistrellus</i> sp.                |         | 1    | 8      | 3    | 12             |
| <i>Rhinolophus monoceros</i>           | 3       | 3    |        |      | 6              |
| <i>Murina puta</i>                     | 3       |      | 3      |      | 6              |
| <i>Nyctalus plancyi velutinus</i>      | 1 (1)   |      |        | 3    | 4 (1)          |
| <i>Pteropus dasymallus formosus</i>    |         | 1    |        |      | 1              |
| <i>Rhinolophus formosae</i>            |         |      | 1      |      | 1              |
| <i>Myotis fimbriatus taiwanensis</i>   |         |      | 1      |      | 1              |
| <i>Myotis secundus</i>                 |         |      |        | 1    | 1              |
| <i>Kerivoula titania</i>               |         |      |        | 1    | 1              |
| unidentified species                   | 23      | 7    | 10     | 2    | 42             |
| Total number                           | 125 (2) | 116  | 89 (1) | 77   | 407 (3)        |

**Table S4.** The results of the positive cases, employed with different diagnostic methods.

| Isolate name*    | Direct fluorescent antibody test |                          | RT-PCR*       |             | Virus isolation |
|------------------|----------------------------------|--------------------------|---------------|-------------|-----------------|
|                  | FITC-conjugated antibody         | FITC-conjugated antibody | JW12/N165-146 | N113F/N304R |                 |
|                  | (Catalog No. 5100)               | (Catalog No. 800-092)    |               |             |                 |
| TWBLV-1/YiL/2018 | +                                | ±                        | +             | +           | +               |
| TWBLV-1/KL/2020  | +                                | —                        | +             | +           | +               |
| TWBLV-2/NT/2018  | +                                | +                        | +             | +           | +               |

\*. RT-PCR: reverse transcription polymerase chain reaction

**Table S5.** The genomic organization of the identified lyssaviruses in Taiwan.

|           | TWBLV-1/TN/2016<br>TWBLV-1/YL/2017 | TWBLV-1/YiL/2018 | TWBLV-1/KL/2020 | TWBLV-2/NT/2018 |
|-----------|------------------------------------|------------------|-----------------|-----------------|
| 3' UTR    | 70                                 | 69               | 69              | 69              |
| N protein | 1356                               | 1356             | 1356            | 1356            |
| N-P       | 99                                 | 100              | 99              | 106             |
| P protein | 897                                | 894              | 897             | 894             |
| P-M       | 82                                 | 82               | 82              | 80              |
| M protein | 609                                | 609              | 609             | 609             |
| M-G       | 212                                | 212              | 212             | 212             |
| G protein | 1629                               | 1623             | 1629            | 1623            |
| G-L       | 518                                | 529              | 518             | 524             |
| L protein | 6384                               | 6384             | 6384            | 6384            |
| 5' UTR    | 132                                | 131              | 132             | 133             |
| Genome    | 11988                              | 11989            | 11987           | 11990           |

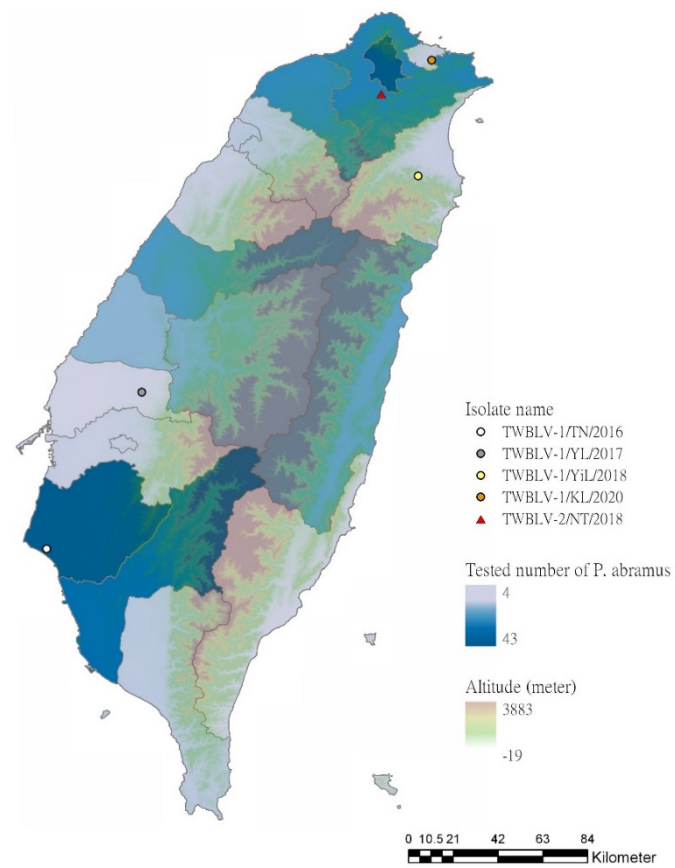

**Figure S1.** Map of Taiwan island, showing the tested number of *Pipistrellus abramus* during 2018~2021, by counties/cities. The location of the identified bat lyssaviruses isolates also indicated.

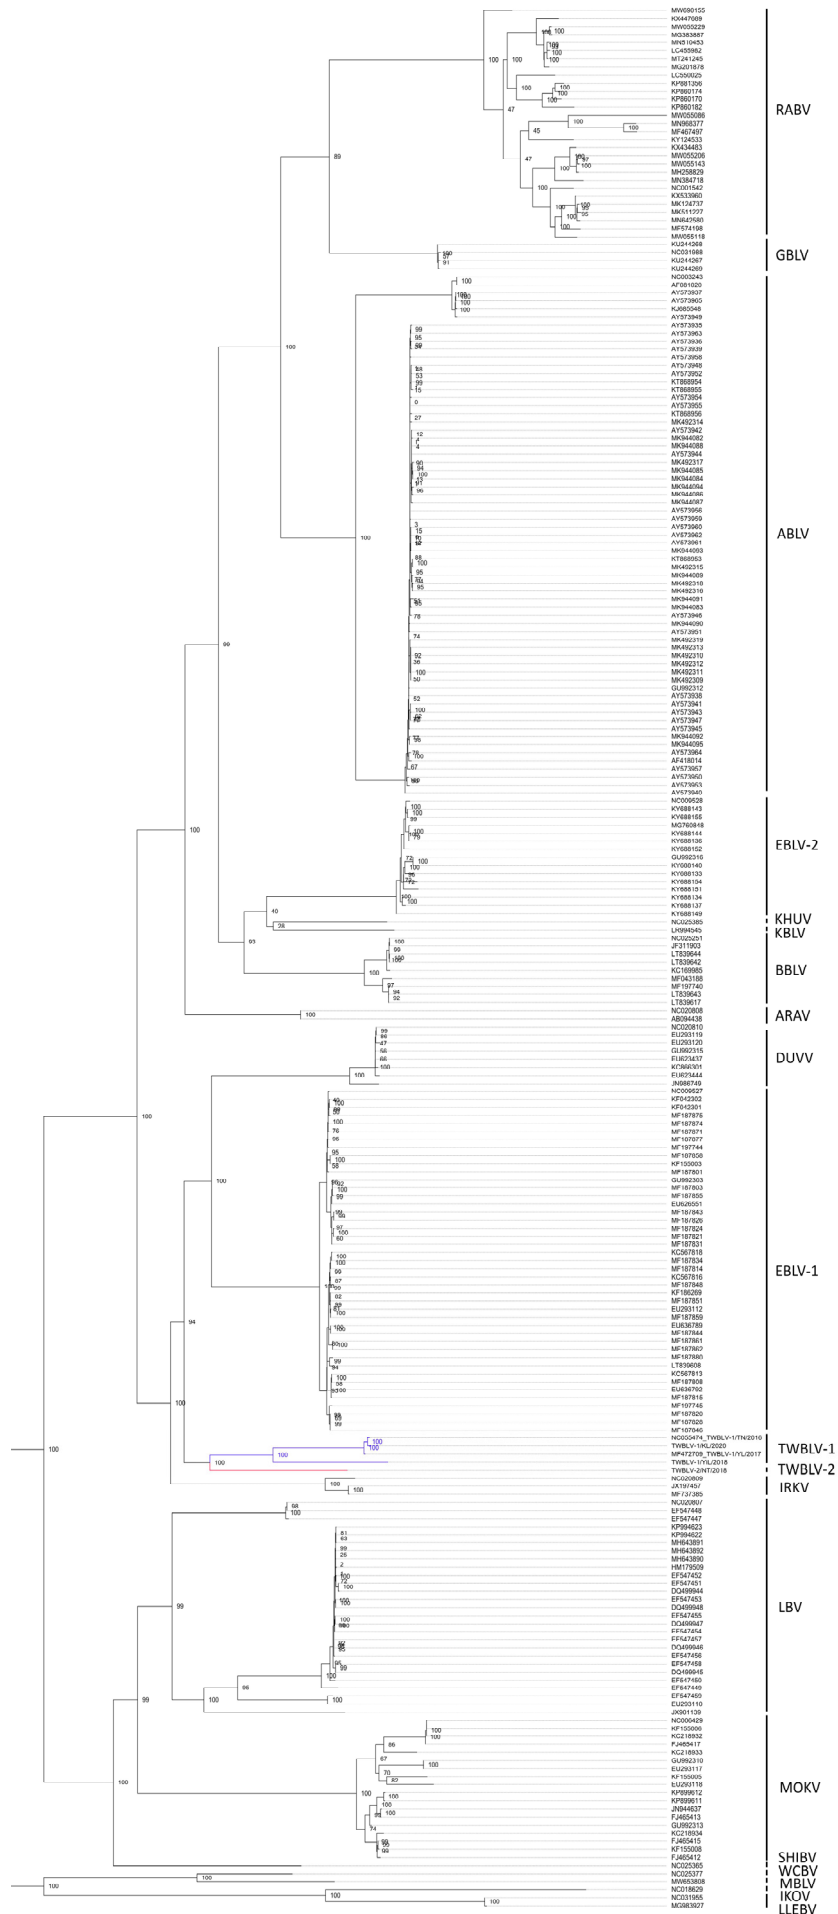

RABV

GBLV

ABLV

Phylogroup I

EBLV-2

KHUV

KBLV

BBLV

ARAV

DUUV

EBLV-1

TWBLV-1

TWBLV-2

IRKV

LBV

Phylogroup II

MOKV

SHIBV

WCBV

MBLV

LLEBV

Phylogroup III

**Figure S2.** The detail phylogenetic tree of the complete nucleoprotein gene of lyssaviruses.
